# Supplementary material
Source: Research Square preprint supplement (doi:10.21203/rs.3.rs-9864134/v1)
Supplement: Supplementary file 1 [file 865bf34b94fa1b78adb45c6c.docx]

**CONSORT 2025 Checklist – Randomized Trial**

| **Section** | **Item** | **Description** | **Reported on Page** |
| --- | --- | --- | --- |
| Title | 1a | Identification as randomized trial in title | Page 1 |
| Abstract | 1b | Structured summary of trial design, methods, results | Page 1 |
| Introduction | 2a | Scientific background and rationale | Page 2 |
| Introduction | 2b | Specific objectives or hypotheses | Page 2 |
| Methods | 3a | Description of trial design | Page 3 |
| Methods | 3b | Changes to methods after trial commencement | Page 3 |
| Methods | 4a | Eligibility criteria | Page 3 |
| Methods | 4b | Settings and locations | Page 3 |
| Methods | 5 | Interventions | Page 6 |
| Methods | 6a | Primary and secondary outcomes | Page 4 |
| Methods | 6b | Changes to outcomes | Page 4 |
| Methods | 7a | Sample size determination | Page 5 |
| Methods | 7b | Interim analyses/stopping guidelines | Page 5 |
| Methods | 8a | Sequence generation method | Page 5 |
| Methods | 8b | Type of randomization and restrictions | Page 5 |
| Methods | 9 | Allocation concealment mechanism | Page 5 |
| Methods | 10 | Implementation | Page 5 |
| Methods | 11a | Blinding | Page 5 |
| Methods | 11b | Similarity of interventions | Page 6 |
| Methods | 12a | Statistical methods for primary outcome | Page 6 |
| Methods | 12b | Additional analyses | Page 6 |
| Results | 13a | Participant flow | Page 6 |
| Results | 13b | Losses and exclusions | Page 6 |
| Results | 14a | Recruitment dates | Page 6 |
| Results | 15 | Baseline data | Page 6 |
| Results | 16 | Numbers analyzed | Page 6 |
| Results | 17 | Outcomes and effect size | Page 8 |
| Results | 18 | Ancillary analyses | Page 9 |
| Results | 19 | Harms | Page 9 |
| Discussion | 20 | Limitations | Page11 |
| Discussion | 21 | Generalizability | Page 11 |
| Discussion | 22 | Interpretation | Page 11 |
| Other | 23 | Trial registration | Page 11 |
| Other | 24 | Protocol access | Page 12 |
| Other | 25 | Funding | Page 12 |
